# Supplementary material for: The Synthesis of Ginsenoside Compound K Using a Surface-Displayed β-Glycosidase Whole-Cell Catalyst
Source: MDPI journal article supplement (doi:10.3390/catal13101375), 2023-10-18
Supplement: s1 [file s1]

**Table S1.** Primers used in this study.

| Primers | Sequences(5'-3')                                |
|---------|-------------------------------------------------|
| bgp-F   | ccgaattcgagctccgtcgacATGGAACCGCAGATGACCAA       |
| bgp-R   | gtggtggtggtggtgctcgagTTAGGCAAAAAGTCTGCATTC      |
| YiaT-F  | atgggtcgcggatccgaattcATGTTAATTAATCGCAATATTGTGGC |
| YiaT-R  | catctgcggtccatgtcgacACGATCAATCATCGGGCTGT        |

**Figure S1.** Agarose electrophoresis diagram: (a) Lane M: Trans2K Plus II DNA Marker; Lane 1: plasmid pET28a-*bgp3* digested with *Xho* I and *Bgl* II; (b) Lane 2: plasmid pET28a-*yiaT-bgp3* digested with *Xho* I and *Bgl* II; Lane M: Trans2K Plus II DNA Marker.

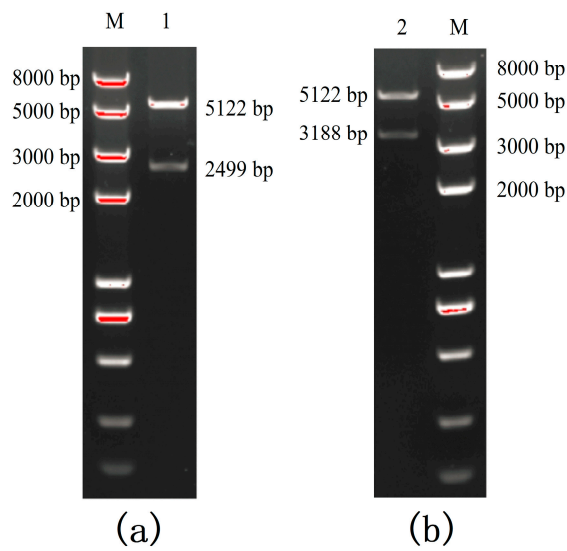

**Figure S2.** The effect of IPTG concentration on specific enzyme activity.

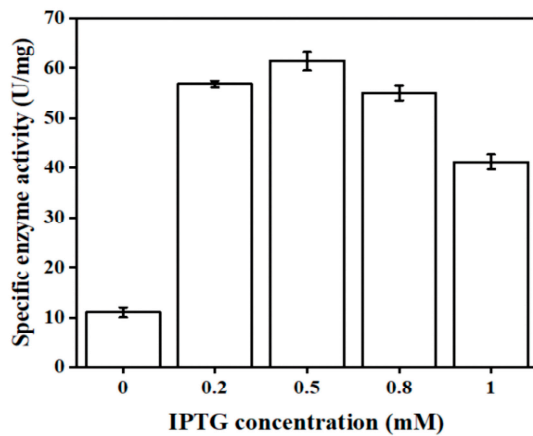

**Figure S3.** HPLC analysis: (a) Standard; (b) Sample (IPTG concentration: 0.5 mM; induction temperature: 16°C; ginsenoside substrate concentration: 15 mg/mL; catalytic temperature: 30°C; reaction time: 24 h).

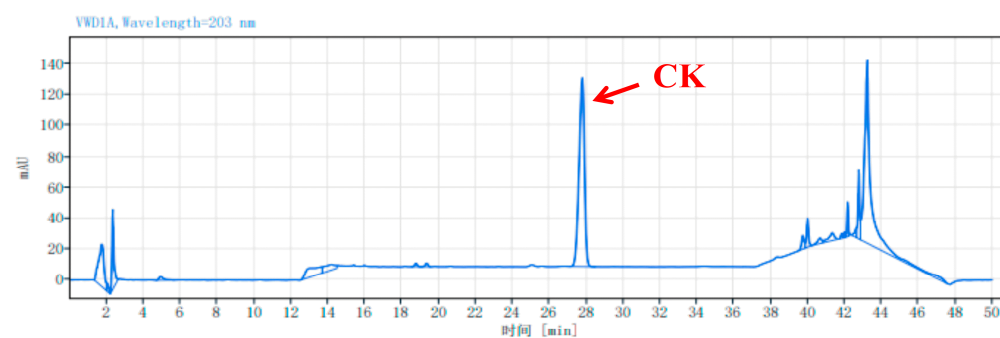

(a)

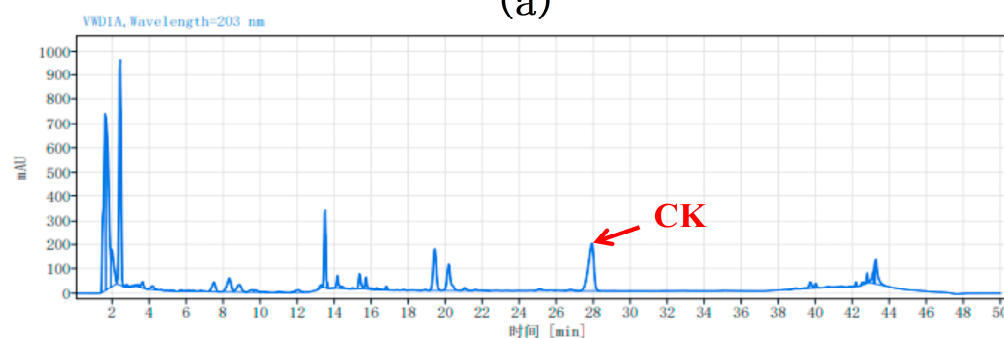

(b)
